# Supplementary material
Source: PubMed Central journal article supplement (PMC5948160)

transfected with either 25 nM control siRNA (CTL siRNA) or OCT-1 siRNA following treatment with 10  $\mu$ M metformin for 21 days. Data represent mean  $\pm$  S.E.M. \* $p$ <0.05, when comparing OCT-1 siRNA-transfected cells *versus* CTL siRNA-transfected cells.

## SUPPLEMENTARY MATERIAL

### ***FIGURE LEGEND***

**Figure S1. Metformin treatment activates AMPK pathway in UC-MSC-2 cells.** Whole cell lysates extracted from UC-MSC-2 cells following a 3-hour treatment with increasing doses of metformin were analyzed by Western blotting to determine the expression levels of phosphorylated AMPK $\alpha$ 1 at Thr172 (pAMPK) and total AMPK.

**Supplementary Material**

Figure S1

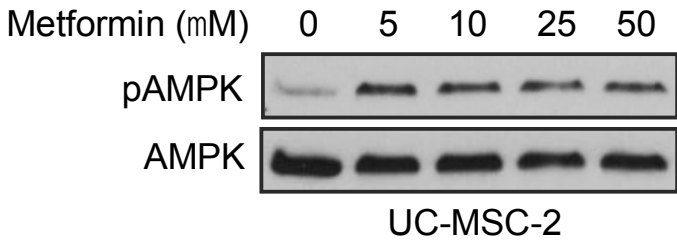

Supplement: NIHMS948910-supplement-supplement_1.pdf [file NIHMS948910-supplement-supplement_1.pdf]
